# Supplementary material
Source: PubMed Central journal article supplement (PMC3023383)
Supplement: supp_00159.2010_figS2.pdf [file supp_00159.2010_figS2.pdf]

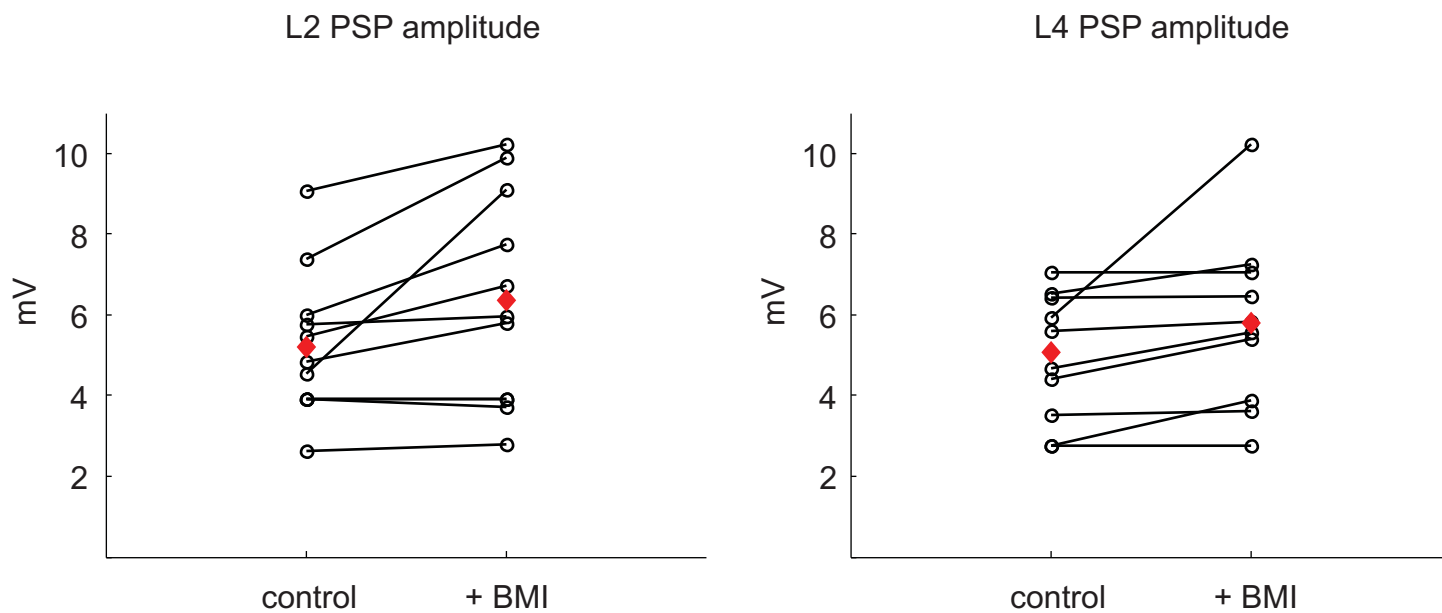

FIG. S2. PSP amplitudes before and after application of bicuculline. Left: Individual experiments showing PSP amplitude evoked from L2/3 stimulation; red diamonds indicate the population mean responses for control conditions and after application of bicuculline (2 or 3  $\mu$ M). Right: Individual experiments showing PSP amplitudes evoked from L4 stimulation; red diamonds indicate the population mean response.
