# Supplementary material
Source: PubMed Central journal article supplement (PMC3023383)
Supplement: supp_00159.2010_figS3.pdf [file supp_00159.2010_figS3.pdf]

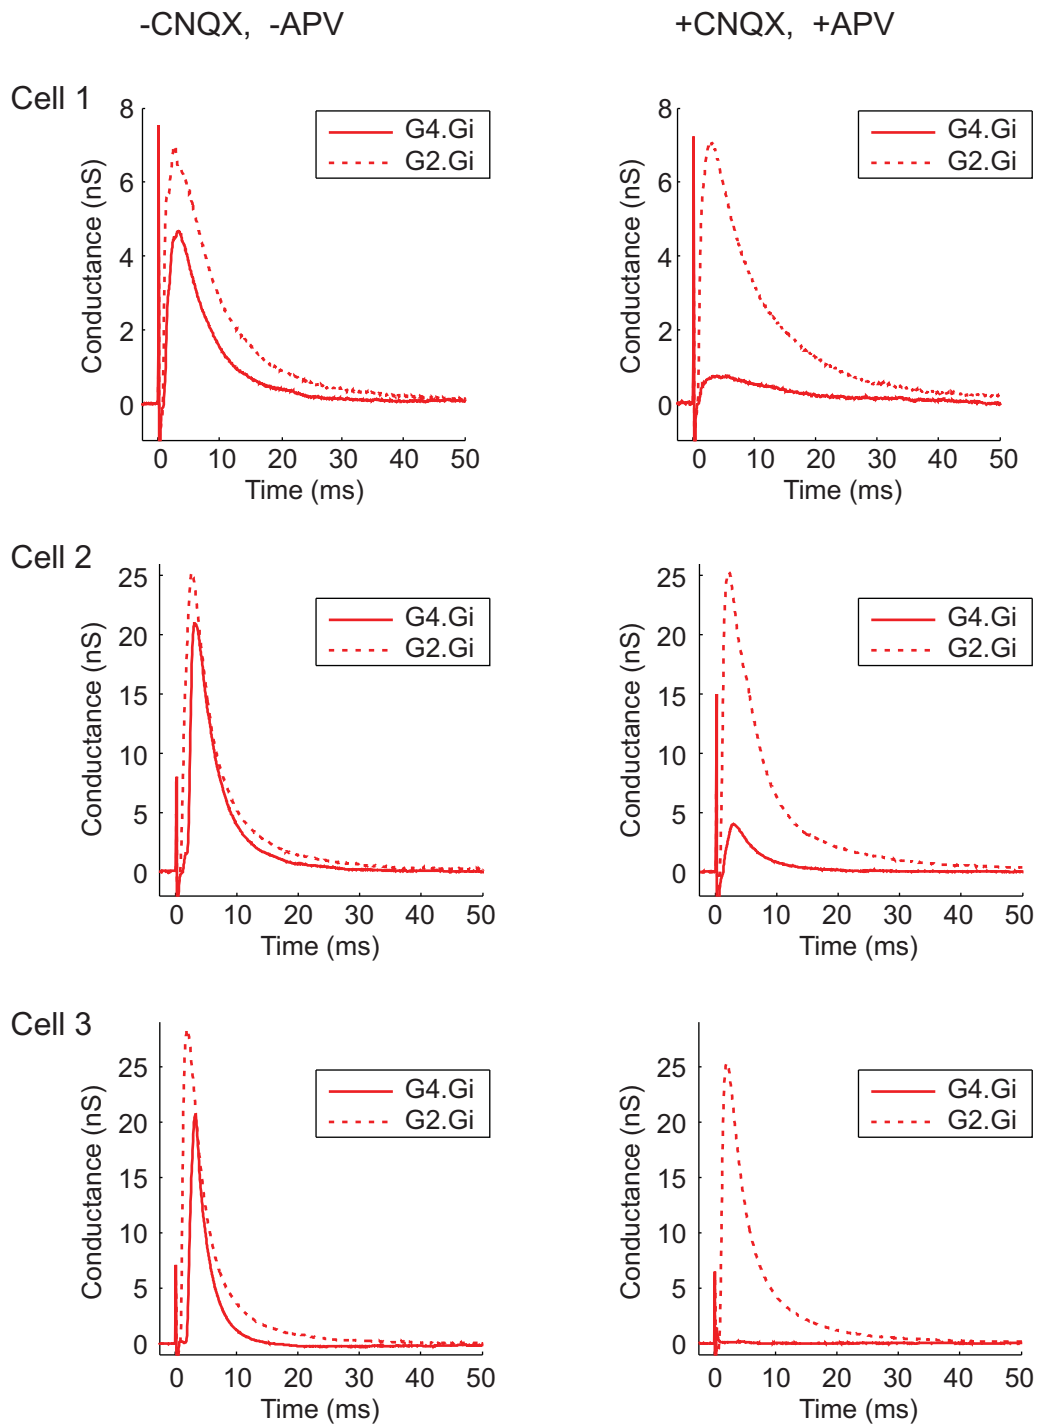

FIG. S3. Inhibitory conductances during blockade of excitatory transmission recorded from three individual cells evoked by stimulation in L4 or L2/3. On the left are the inhibitory conductances (dashed line: from L2/3; solid line: from L4) before drug application. On the right are the inhibitory conductances measured after application of APV (50  $\mu$ M) and CNQX (15  $\mu$ M).
